# Supplementary material for: Preparation of Rh–SiO2 fiber catalyst with superior activity and reusability by electrospinning
Source: Royal Society of Chemistry journal article supplement (doi:10.1039/c5ra20473a), 2015-01-01
Supplement: c5ra20473a1.pdf [file c5ra20473a1.pdf]

# Electronic Supplementary Information

## Preparation of Rh-SiO<sub>2</sub> fiber catalyst with superior activity and reusability by electrospinning

Rui Zou,<sup>a, b</sup> Shipeng Wen,<sup>c</sup> Liqun Zhang,<sup>a, b</sup> Li Liu,<sup>c\*</sup> and Dongmei Yue<sup>a, b\*</sup>

<sup>a</sup> State Key Laboratory of Organic-Inorganic Composites, Beijing University of Chemical Technology, Beijing 100029, China

<sup>b</sup> Beijing Engineering research center of advanced elastomers, Beijing University of Chemical Technology, Beijing 100029, China

<sup>c</sup> State Key Laboratory of Chemical Resource Engineering, Beijing University of Chemical Technology, Beijing 100029, China

\*Corresponding authors: Dongmei Yue,

E-mail: Yuedm@mail.buct.edu.cn,

Tel.: +86-010-64436201; Fax: +86-010-64436201.

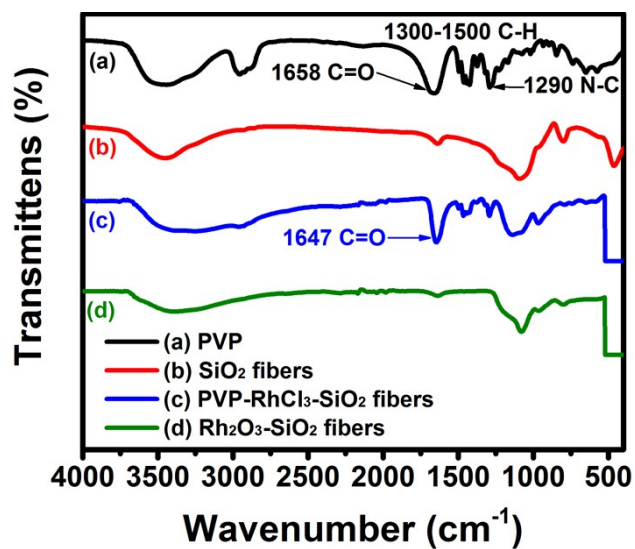

**Figure S1.** FTIR spectra of (a) PVP, (b) SiO<sub>2</sub> fibers, (c) PVP-RhCl<sub>3</sub>-SiO<sub>2</sub> fibers, and (d) Rh<sub>2</sub>O<sub>3</sub>-SiO<sub>2</sub> fibers.

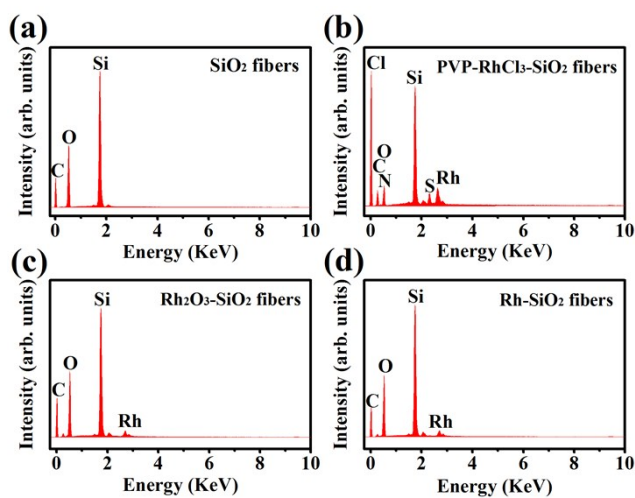

**Figure S2.** EDS spectra of (a) SiO<sub>2</sub> fibers, (b) PVP-RhCl<sub>3</sub>-SiO<sub>2</sub> fibers, (c) Rh<sub>2</sub>O<sub>3</sub>-SiO<sub>2</sub> fibers, and (d) Rh-SiO<sub>2</sub> fibers.

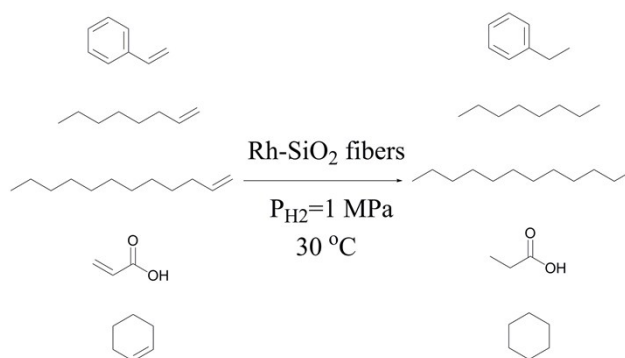

**Figure S3.** Hydrogenation of alkenes with different structures by Rh-SiO<sub>2</sub> fibers.

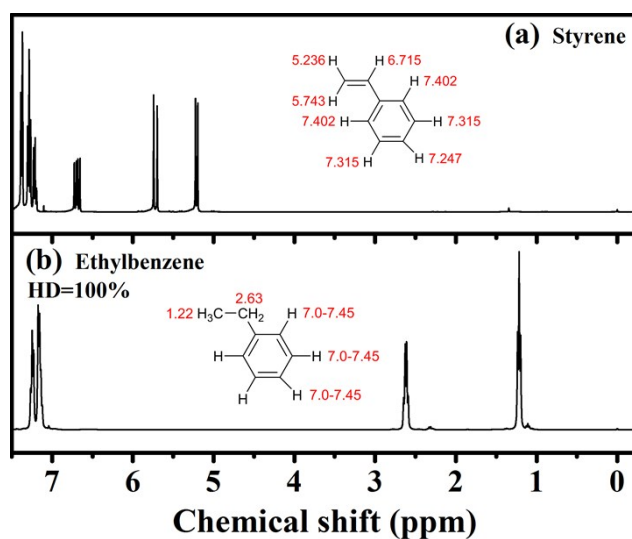

**Figure S4.** <sup>1</sup>H-NMR spectra of (a) styrene and (b) hydrogenation product of styrene.

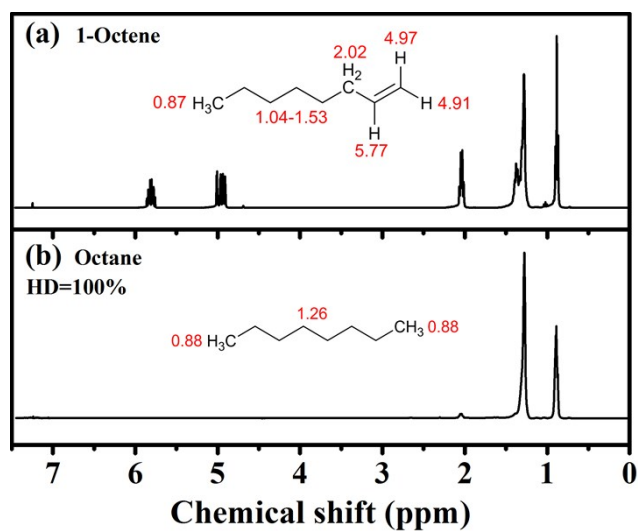

**Figure S5.**  $^1\text{H}$ -NMR spectra of (a) 1-octene and (b) hydrogenation product of 1-octene.

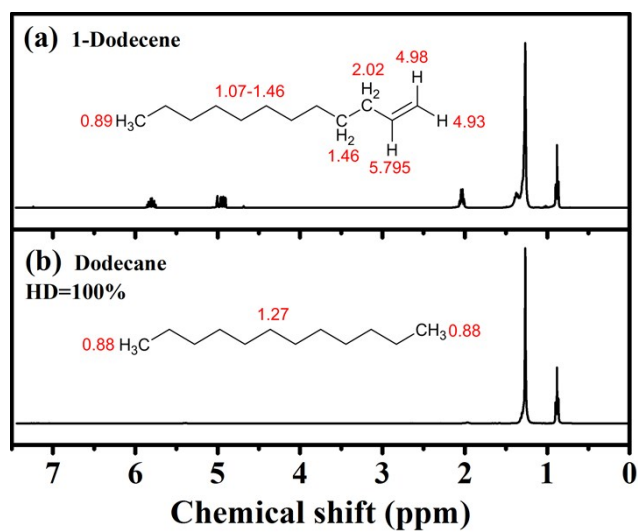

**Figure S6.**  $^1\text{H}$ -NMR spectra of (a) 1-dodecene and (b) hydrogenation product of 1-dodecene.

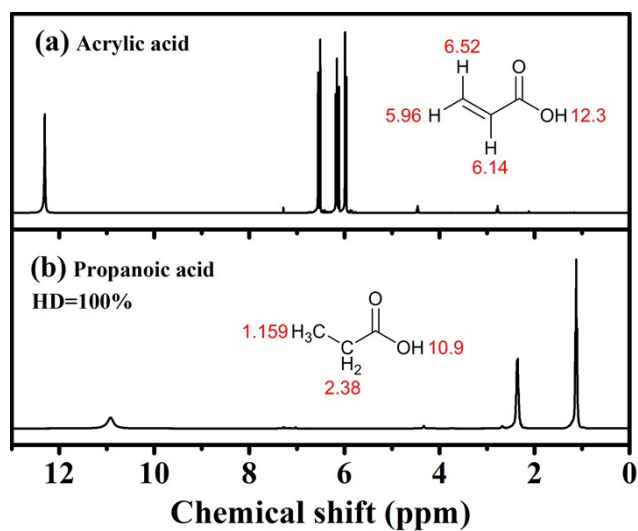

**Figure S7.**  $^1\text{H}$ -NMR spectra of (a) acrylic acid and (b) hydrogenation product of acrylic acid.

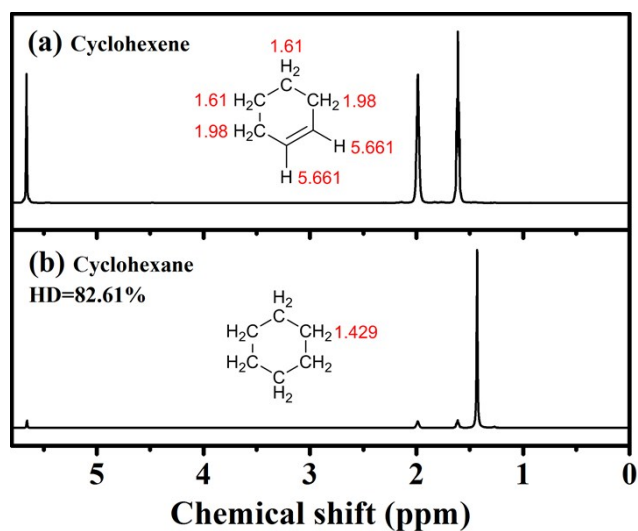

**Figure S8.**  $^1\text{H}$ -NMR spectra of (a) cyclohexene and (b) hydrogenation product of cyclohexene.
